# Supplementary material for: Tumor-Stroma Proportion to Predict Chemoresistance in Patients With Ovarian Cancer
Source: PubMed Central journal article supplement (PMC10900967; doi:10.1001/jamanetworkopen.2024.0407), 2024-02-27
Supplement: jamanetwopen-e240407-s001.pdf [file jamanetwopen-e240407-s001.pdf]

## Supplemental Online Content

Lou E, Clemente V, Grube M, et al. Tumor-stroma proportion to predict chemoresistance in patients with ovarian cancer. *JAMA Netw Open*. 2024;7(2):e240407. doi:10.1001/jamanetworkopen.2024.0407

**eTable 1.** Patient Demographics and Clinical Characteristics of 192 Women Diagnosed with High Grade Serous Carcinoma (HGSC) of the Ovaries (University of Tübingen Cohort)

**eTable 2.** Multivariate Analysis of Progression Free Survival

**eTable 3.** Multivariate Analysis of Overall Survival

**eFigure 1.** Validation of the Use of TMAs to Predict Overall and Progression-Free Survival Based on TSP in the Tübingen Cohort

**eFigure 2.** Comparison of TSP Assessment in TMAs With Its Assessment in Slides

**eTable 4.** Multivariate Analysis Chemoresistance

This supplemental material has been provided by the authors to give readers additional information about their work.

**eTable 1. Patient Demographics and Clinical Characteristics of 192 Women Diagnosed with High Grade Serous Carcinoma (HGSC) of the Ovaries (University of Tübingen Cohort).** SD=standard deviation; FIGO=Federation Internationale de Gynecologie et d'Obstetrique.; TMA=Tissue MicroArray

| Characteristic                     | Level   | Slides              | TMA         |
|------------------------------------|---------|---------------------|-------------|
| <b>Number of patients</b>          |         | 192                 | 185         |
| <b>Age at diagnosis, mean (SD)</b> |         | 63.7 (11.1) (n=192) | 63.4 (11.4) |
| <b>Histology</b>                   | HGSC    | 192 (100.0%)        | 185 (100%)  |
| <b>FIGO Stage</b>                  | 1       | 8 (4.2%)            | 6 (3.2%)    |
|                                    | 2       | 14 (7.3%)           | 14 (7.6%)   |
|                                    | 3       | 134 (69.8%)         | 129 (69.7%) |
|                                    | 4       | 36 (18.8%)          | 36 (19.5%)  |
| <b>Tumor (T)</b>                   | 1       | 9 (4.7%)            | 7 (3.8%)    |
|                                    | 2       | 47 (24.5%)          | 45 (24.3%)  |
|                                    | 3       | 130 (67.7%)         | 127 (68.6%) |
|                                    | Unknown | 6 (3.1%)            | 6 (3.2%)    |
| <b>Nodes (N)</b>                   | N0      | 75 (39.1%)          | 70 (37.8%)  |
|                                    | N1      | 95 (49.5%)          | 94 (50.8%)  |
|                                    | Unknown | 22 (11.5%)          | 21 (11.4%)  |
| <b>Metastases (M)</b>              | 0       | 132 (68.8%)         | 126 (68.1%) |
|                                    | 1       | 36 (18.8%)          | 36 (19.5%)  |
|                                    | Unknown | 24 (12.5%)          | 23 (12.4%)  |
| <b>Residual Disease</b>            | No      | 80 (41.7%)          | 74 (40%)    |
|                                    | Yes     | 108 (56.3%)         | 107 (57.8%) |
|                                    | Unknown | 4 (2.1%)            | 4 (2.2%)    |

**eTable 2. Multivariate Analysis of Progression Free Survival**

| Variable                | Haz. ratio | P-value     | [95% conf. interval] |       |
|-------------------------|------------|-------------|----------------------|-------|
| <b>TSP</b>              | 1.586      | <b>0.02</b> | 1.093                | 2.302 |
| <b>Age</b>              | 1.010      | 0.19        | 0.995                | 1.024 |
| <b>Metastasis</b>       | 1.138      | 0.53        | 0.761                | 1.703 |
| <b>Residual Disease</b> | 2.038      | <0.001      | 1.436                | 2.892 |

**eTable 3. Multivariate Analysis of Overall Survival**

| Variable                | Haz. ratio | P-value      | [95% conf. interval] |       |
|-------------------------|------------|--------------|----------------------|-------|
| <b>TSP</b>              | 1.867      | <b>0.002</b> | 1.249                | 2.789 |
| <b>Age</b>              | 1.035      | <0.001       | 1.018                | 1.052 |
| <b>Metastasis</b>       | 1.572      | 0.03         | 1.040                | 2.375 |
| <b>Residual Disease</b> | 2.604      | <0.001       | 1.764                | 3.844 |

**eFigure 1. Validation of the Use of TMAs to Predict Overall and Progression-Free Survival Based on TSP in the Tübingen Cohort.**

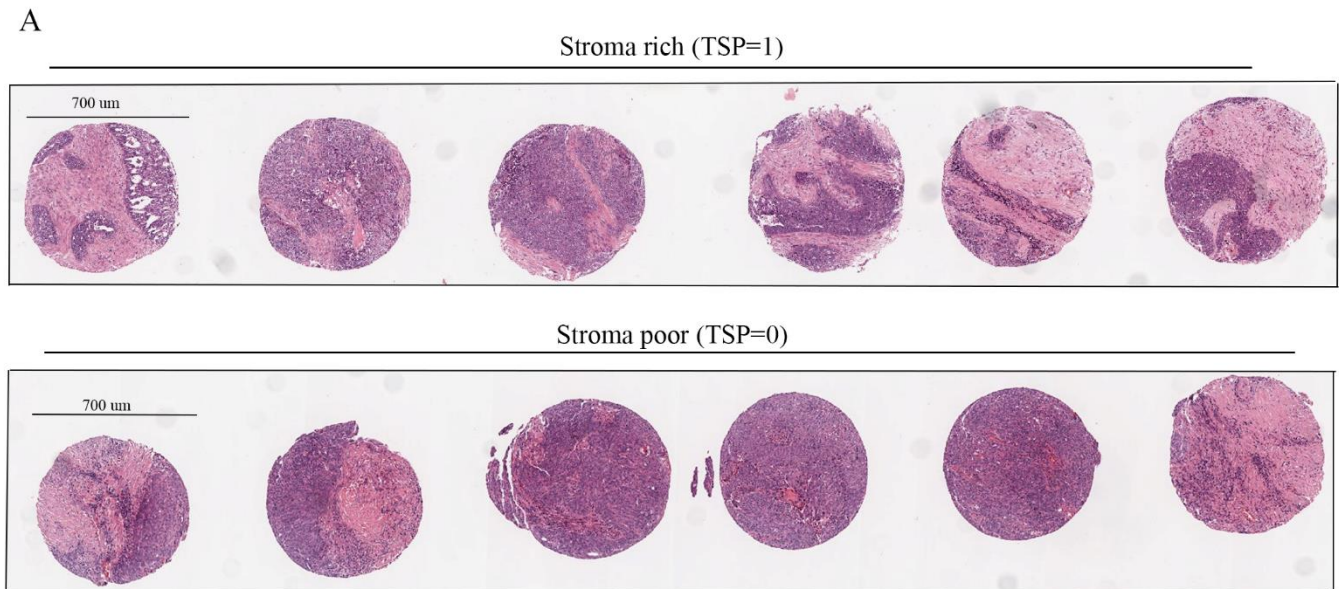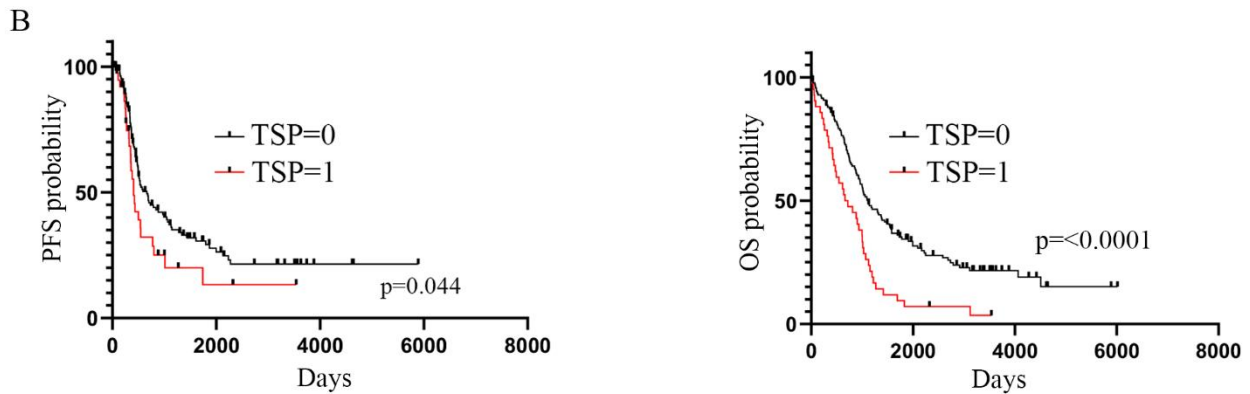

|                                |                  |                |
|--------------------------------|------------------|----------------|
| Hazard Ratio (Mantel-Haenszel) | A/B              | B/A            |
| Ratio (and its reciprocal)     | 0.5972           | 1.675          |
| 95% CI of ratio                | 0.3608 to 0.9884 | 1.012 to 2.772 |

|                                |                  |                |
|--------------------------------|------------------|----------------|
| Hazard Ratio (Mantel-Haenszel) | A/B              | B/A            |
| Ratio (and its reciprocal)     | 0.4015           | 2.491          |
| 95% CI of ratio                | 0.2556 to 0.6307 | 1.585 to 3.912 |

**A.** *Top*, representative images of stroma rich. *Bottom*, representative images of stroma poor. **B.** *Left*, Kaplan-Meier curve for progression-free survival (PFS) in patients with low TSP (TSP=0) vs. high TSP (TSP=1) ( $p=0.04$ ; HR 1.675 95% CI 1.012-2.772) as defined by scoring TMAs. *Right*, Kaplan-Meier curve for overall survival (OS) in patients with low TSP (TSP=0) vs. high TSP (TSP=1) as defined by scoring TMAs ( $p < 0.001$ ; HR 2.491 95% CI 1.585-3.912)

eFigure 2. Comparison of TSP Assessment in TMAs With Its Assessment in Slides

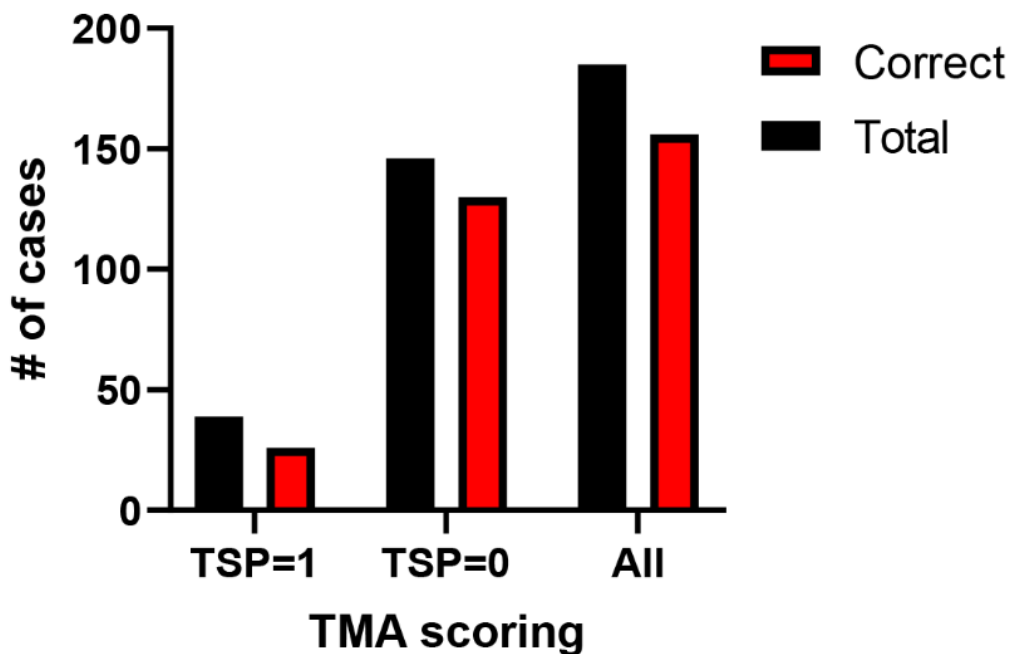

From left to right: high TSP, low TSP, and all cases that were identified in TMAs (black) associated with the respective number of cases that were consistent with TSP assessment in slides (red).

eTable 4. Multivariate Analysis Chemoresistance

| Variable                   | Odds ratio | P-value     | [95% conf. interval] |
|----------------------------|------------|-------------|----------------------|
| <b>TSP</b>                 | 2.861      | <b>0.01</b> | 1.256 6.515          |
| <b>Age at diagnosis</b>    | 0.991      | 0.60        | 0.958 1.025          |
| <b>Metastases</b>          | 2.059      | 0.10        | 0.877 4.831          |
| <b>Residual disease</b>    | 1.961      | 0.10        | 0.862 4.462          |
| <b>Lymph Node invasion</b> | 2.580      | 0.07        | 0.944 7.049          |
| <b>Metastases</b>          | 1.737      | 0.23        | 0.697 4.327          |
