# Supplementary material for: Tumor-Stroma Proportion to Predict Chemoresistance in Patients With Ovarian Cancer
Source: PubMed Central journal article supplement (PMC10900967; doi:10.1001/jamanetworkopen.2024.0407), 2024-02-27
Supplement: jamanetwopen-e240407-s002.pdf [file jamanetwopen-e240407-s002.pdf]

## **Data Sharing Statement**

Lou. Tumor-Stroma Proportion to Predict Chemoresistance in Patients With Ovarian Cancer. *JAMA Netw Open*. Published February 27, 2024. doi:10.1001/jamanetworkopen.2024.0407

### **Data**

**Data available:** No
